# Supplementary material
Source: publisher figshare collection journal article supplement (https://rs.figshare.com/ndownloader/files/13124591)
Supplement: Supplementary file 1 [file 13124591]

## Sheet: Sheet1
		General		Tooth Morphology				Blades					Flange			Tip		Base		Root
		Tooth/Dent	Fragmentation	Overall Shape	Curved	Shape of V	Edges	Blade Present	Blade symmetry	Width along blade	blade width	Blade Length	Flange present	Flange length	Flange location	Tip shape	Tip material	Base shape	Base tips	Root present	Root base width	Root length	Root Shape (edges)	Root Width (middle)	Root Shape (base)	Root Shape (tip)
ID Number	Morphotype Name	A	B	C	E	F	G	H1	H2	H3	H4	H5	K1	K2	K3	L	M	N1	N2	O	P	Q	R1	R2	R3	R4
1	Acrodin Tip, 1/2 length Concave Root	1	1	2	1	1	3	2	1	3	2	5	0	0	0	2	2	1	3	1	2	2	2	1	1	4
2	Acrodin Tip, 1/2 length Concave root, flared blades	1	1	2	1	1	3	2	1	3	2	4	0	0	0	2	1	1	1	1	3	2	2	2	1	1
3	Acrodin Tip, 1/2 length Concave Root, no tips	1	1	2	1	1	3	2	1	3	2	1	0	0	0	2	2	1	1	1	2	2	2	1	1	2
4	Acrodin Tip, 1/2 length convex root	1	1	2	1	1	3	2	1	1	2	1	0	0	0	2	2	2	1	1	3	3	7	2	1	3
5	Acrodin Tip, 1/2 length funnel root	1	1	2	1	1	3	2	1	1	2	1	0	0	0	2	2	1	1	1	3	2	4	3	3	4
6	Acrodin Tip, 1/2 length straight root	1	1	2	1	1	3	2	1	1	2	1	0	0	0	2	2	2	2	1	3	2	1	2	2	2
7	Acrodin Tip, 1/2 length straight root, flare blades	1	1	2	1	1	3	2	1	3	2	5	0	0	0	2	2	1	1	1	3	2	1	2	2	1
8	Acrodin Tip, 1/4 length concave root	1	1	2	1	1	3	2	1	3	2	1	0	0	0	2	2	2	2	1	2	1	1	2	1	2
9	Acrodin Tip, 1/4 length dome root	1	1	2	1	1	3	2	1	1	2	1	0	0	0	2	2	1	1	1	3	1	3	3	2	3
10	Acrodin Tip, 3/4 length concave root	1	1	2	1	1	3	2	1	1	1	1	0	0	0	2	2	1	1	1	3	3	2	1	2	4
11	Acrodin Tip, 3/4 length convex root	1	1	2	1	1	3	2	1	1	2	1	0	0	0	2	2	2	1	1	3	3	3	2	3	2
12	Acrodin Tip, 3/4 length straight root	1	1	2	1	1	3	2	1	1	2	1	0	0	0	2	2	2	4	1	3	3	1	2	2	1
13	Acrodin Tip, Cone-like, Big blades	1	1	2	1	1	3	2	1	1	2	1	0	0	0	2	2	1	1	1	3	3	1	2	2	1
14	Acrodin Tip, Cone, small dome root	1	1	1	1	3	1	1	0	0	0	0	0	0	0	3	4	1	1	1	2	1	3	3	2	3
15	Acrodin Tip, convex tooth, straight 1/2 root	1	1	2	3	1	3	2	1	1	1	1	0	0	0	3	2	1	1	1	4	2	1	2	2	1
16	Acrodin Tip, convex tooth, straight 3/4 root	1	1	2	3	1	3	2	1	1	1	1	0	0	0	3	2	1	1	1	3	3	1	2	2	2
17	Acrodin Tip, Convex, Curved	1	1	2	2	3	2	1	0	0	0	0	0	0	0	3	2	1	1	1	3	2	3	3	2	3
18	Acrodin Tip, Curve, 1/2 concave root	1	1	2	2	4	3	3	3	3	2	5	1	4	2	2	2	2	1	1	4	2	2	1	1	1
19	Acrodin Tip, curve, full root	1	1	2	2	4	3	2	1	1	2	1	0	0	0	2	2	1	1	1	4	4	1	2	2	1
20	Acrodin Tip, Dome Root	1	1	2	1	1	3	2	1	1	2	1	0	0	0	2	2	1	1	1	4	3	1	3	2	3
21	Acrodin Tip, extended long root	1	1	2	1	1	3	2	1	1	2	1	0	0	0	2	2	2	1	1	3	3	4	2	2	5
22	Acrodin Tip, Flared Blades	1	1	2	1	1	3	2	1	3	2	1	0	0	0	2	2	1	1	1	3	3	1	2	1	3
23	Acrodin Tip, no obvious root	1	1	2	1	1	3	2	1	1	2	1	0	0	0	2	2	2	2	1	4	3	1	2	2	1
24	Acrodin Tip, pointy convex, 1/2 root	1	1	2	1	3	3	2	1	4	2	1	0	0	0	1	2	1	1	1	4	2	1	2	2	2
25	Acrodin Tip, right, convex	1	1	2	1	5	3	2	1	4	2	1	0	0	0	2	2	1	1	1	4	3	1	2	1	2
26	Acrodin Tip, small blades	1	1	2	1	1	3	2	1	1	1	1	0	0	0	2	2	1	1	1	4	2	1	2	3	3
27	Acrodin Tip, Thick Blades, Big root	1	1	2	1	1	3	2	1	4	2	1	0	0	0	2	4	1	1	1	4	3	1	2	3	3
28	Acrodin Tip, Thick Blades, Small root	1	1	2	1	3	3	2	1	4	2	1	0	0	0	2	4	1	1	1	4	2	1	2	2	1
29	Bladed cone	1	1	1	1	3	3	2	1	1	1	1	0	0	0	3	1	1	1	1	4	3	3	3	2	2
30	Bladed cone (acrodin tip)	1	1	1	1	3	2	2	1	1	1	1	0	0	0	3	2	1	1	1	4	3	1	2	2	2
31	Bladed cone (acrodin tip), curved	1	1	1	2	3	2	2	1	1	1	1	0	0	0	3	2	1	1	1	4	3	1	2	2	3
32	Bladed cone single blade	1	1	1	1	1	3	3	3	3	2	4	0	0	0	2	1	1	1	1	4	3	2	1	2	5
33	Bladed cone small root acrodin tip	1	1	1	1	1	2	2	1	1	1	1	0	0	0	2	3	1	1	1	3	2	3	3	2	3
34	Bladed cone straight no flare	1	1	1	1	1	3	2	1	1	1	1	0	0	0	2	1	1	1	1	4	2	1	2	2	2
35	Bladed cone, curved	1	1	1	2	1	3	2	1	1	1	1	0	0	0	2	1	1	1	1	4	2	3	2	3	3
36	Blades on top	1	1	2	1	1	3	2	1	2	2	3	0	0	0	2	1	1	1	1	4	3	4	2	2	4
37	Blades on top (cone)	1	1	1	1	1	3	2	1	2	2	3	0	0	0	2	2	1	1	1	3	1	3	3	3	3
38	Clear, 1/2 convex root	1	1	2	1	1	3	2	1	1	2	1	0	0	0	2	1	1	1	1	4	2	3	3	3	5
39	Clear, 1/2 dome root	1	1	1	1	1	1	1	0	0	0	0	0	0	0	2	1	1	1	1	4	2	3	3	3	3
40	Clear, 1/2 straight dome root	1	1	2	1	1	3	2	1	1	3	1	0	0	0	2	1	1	1	1	3	2	2	3	2	3
41	Clear, 1/2 straight root	1	1	2	1	1	3	2	1	1	2	1	0	0	0	2	1	1	1	1	3	2	2	2	2	2
42	Clear, 1/3 dome root	1	1	2	1	1	3	2	1	1	2	1	0	0	0	2	2	1	1	1	3	2	3	3	3	3
43	Clear, 1/4 straight root	1	1	2	1	1	3	2	1	1	1	1	0	0	0	2	1	1	1	1	4	1	1	2	2	2
44	Clear, 1/4 straight root, convex tooth	1	1	2	1	3	3	2	1	1	1	1	0	0	0	2	1	1	1	1	4	1	1	2	2	2
45	Clear, 3/4 concave root	1	1	2	1	1	3	2	1	1	2	1	0	0	0	2	1	1	1	1	4	3	2	1	2	4
46	Clear, 3/4 Dome root	1	1	2	1	1	3	2	1	1	2	1	0	0	0	2	1	1	1	1	4	3	1	3	2	3
47	Clear, 3/4 straight root	1	1	2	1	1	3	2	1	1	2	1	0	0	0	2	1	1	1	1	3	3	1	2	2	1
48	Clear, 3/4 thin root	1	1	2	1	1	3	2	1	1	1	1	0	0	0	2	1	1	1	1	2	3	5	2	2	2
49	Clear, concave tooth, 1/4 root	1	1	2	1	2	3	2	1	3	1	1	0	0	0	2	1	1	1	1	4	1	3	2	2	2
50	Clear, concave tooth, full root	1	1	2	1	2	3	2	1	1	2	1	0	0	0	2	1	1	1	1	4	4	1	3	2	1
51	Clear, convex tooth, 1/4 dome root	1	1	2	1	3	3	2	1	3	2	1	0	0	0	2	1	1	1	1	3	1	3	3	2	3
52	Clear, convex tooth, dome root	1	1	2	1	3	3	2	1	1	2	1	0	0	0	3	1	1	1	1	4	4	3	3	2	3
53	Clear, convex tooth, dome root, small blades	1	1	2	1	3	3	2	1	1	1	1	0	0	0	3	1	1	1	1	4	4	3	3	2	3
54	Clear, curved, 1/2 root	1	1	2	2	1	3	2	1	1	2	1	0	0	0	2	1	1	1	1	3	2	2	2	2	2
55	Clear, curved, concave root	1	1	2	3	4	3	2	1	1	2	1	0	0	0	2	1	2	1	1	4	3	2	2	1	4
56	Clear, curved, full root	1	1	2	2	1	3	2	1	1	2	1	0	0	0	2	1	1	1	1	4	4	1	2	2	2
57	Clear, flange, straight	1	1	2	1	1	3	2	1	1	2	1	1	2	3	2	1	1	1	1	3	3	2	2	2	1
58	Clear, flared blades (small), cocnave root	1	1	2	1	1	3	2	1	3	2	4	0	0	0	2	1	1	1	1	3	2	2	2	3	4
59	Clear, flared blades, 1/2 root	1	1	2	1	1	3	2	1	3	2	1	0	0	0	2	1	1	1	1	4	2	1	3	2	2
60	Clear, flared blades, 3/4 root	1	1	2	1	1	3	2	1	3	2	1	0	0	0	2	1	1	1	1	4	3	1	3	2	2
61	Clear, flared blades, concave root	1	1	2	1	1	3	2	1	3	2	5	0	0	0	2	1	1	1	1	3	3	2	1	1	1
62	Clear, Flat, Curved, 1/2 concave root	1	1	2	2	1	3	2	1	1	2	1	0	0	0	2	1	2	2	1	3	2	2	1	1	2
63	Clear, Flat, Curved, 3/4 concave root	1	1	2	2	1	3	2	1	1	2	1	0	0	0	2	1	2	2	1	3	3	2	1	1	2
64	Clear, Flat, Curved, 3/4 dome root	1	1	2	2	1	3	2	1	1	2	1	0	0	0	2	1	1	1	1	3	3	3	3	3	3
65	Clear, Flat, curved, extended root	1	1	2	2	1	3	2	1	1	2	1	0	0	0	1	1	1	1	1	3	4	1	2	2	5
66	Clear, flat, curved, full root	1	1	2	2	1	3	2	1	1	2	1	0	0	0	2	1	1	1	1	4	3	1	3	2	4
67	Clear, flat, small root	1	1	2	1	1	3	2	1	3	2	1	0	0	0	2	1	1	1	1	2	2	1	2	2	1
68	Clear, flat, straight, tall	1	1	2	1	1	3	2	1	1	2	1	0	0	0	2	1	1	1	1	3	3	1	2	2	1
69	Clear, Flat, thin root	1	1	2	1	1	3	2	1	1	1	1	0	0	0	2	1	1	1	1	2	3	2	2	2	2
70	Clear, full straight root	1	1	2	1	1	3	2	1	1	2	1	0	0	0	2	1	4	4	1	4	3	1	3	2	2
71	Clear, Funnel root	1	1	2	1	1	3	2	2	4	3	1	0	0	0	2	1	4	2	1	3	3	4	1	3	5
72	Clear, large root	1	1	2	1	1	3	2	1	1	2	1	0	0	0	2	1	1	1	1	4	3	1	3	2	1
73	Clear, long flange	1	1	2	1	1	3	2	1	1	2	1	0	0	0	2	1	1	1	1	3	2	3	3	2	2
74	Clear, long flange pointed tip	1	1	2	1	1	3	3	3	1	2	1	1	4	3	1	1	4	4	1	4	3	2	2	2	1
75	Clear, long S-shape root	1	1	2	1	6	3	2	1	1	2	1	0	0	0	2	1	1	1	1	3	3	5	3	2	4
76	Clear, long straight root	1	1	2	1	1	3	2	1	3	2	1	0	0	0	2	1	1	1	1	2	3	5	3	2	3
77	Clear, Long, skinny root	1	1	2	2	1	3	2	1	1	1	1	0	0	0	1	1	1	1	1	2	4	2	1	1	5
78	Clear, pointed tip, 1/2 dome root	1	1	2	1	1	3	2	1	1	2	1	0	0	0	1	1	1	1	1	3	2	1	3	2	3
79	Clear, right, concave extended root	1	1	2	2	6	3	2	1	1	2	1	0	0	0	2	1	1	1	1	4	3	2	2	2	4
80	Clear, right, concave root, flange	1	1	2	1	6	3	2	2	1	4	1	1	4	2	2	1	1	1	1	4	3	2	2	2	2
81	Clear, right, concave root, small flange	1	1	2	1	5	3	2	2	3	3	1	1	2	2	2	1	1	1	1	4	3	2	2	2	2
82	Clear, thick, concave	1	1	2	1	2	3	2	1	1	2	1	0	0	0	2	1	2	1	1	3	2	5	3	1	3
83	Clear, vase-root	1	1	2	1	1	3	2	1	1	2	1	0	0	0	2	1	1	1	1	3	2	3	3	1	6
84	Cloudy, 1/2 root, flare blades	1	1	2	1	1	3	2	1	3	2	1	0	0	0	2	1	1	1	1	3	2	2	2	2	3
85	Cloudy, convex, flared bottom	1	1	2	1	3	3	2	1	1	1	1	0	0	0	3	1	5	1	1	4	1	3	3	2	3
86	Cloudy, curve bladed	1	1	2	1	1	3	2	1	3	2	1	0	0	0	1	1	1	1	1	4	3	1	2	2	3
87	Cloudy, extended triangle	1	1	2	1	2	3	2	1	1	1	1	0	0	0	2	1	1	1	1	4	3	3	3	2	3
88	Cloudy, flare blades	1	1	2	1	2	3	2	1	3	2	4	0	0	0	2	1	1	1	1	3	3	1	2	2	2
89	Cloudy, hooked	1	1	2	2	5	2	1	0	0	0	0	0	0	0	2	1	5	1	1	3	1	1	2	2	3
90	Cloudy, right convex	1	1	2	1	5	3	2	1	1	1	1	0	0	0	2	1	1	1	1	4	3	3	3	2	3
91	Cloudy, small thin root	1	1	2	1	1	3	2	1	1	2	1	0	0	0	2	1	1	1	1	1	1	5	2	1	2
92	Cloudy, Triangle, 3/4 root	1	1	2	1	1	3	2	1	1	2	1	0	0	0	2	1	1	1	1	3	2	2	2	2	3
93	Cloudy, Triangle, 3/4 root thin blades	1	1	2	1	1	3	2	1	1	1	1	0	0	0	2	1	1	1	1	3	2	1	2	2	2
94	Cloudy, Triangle, dome root	1	1	2	1	1	3	2	1	1	1	1	0	0	0	3	1	1	1	1	3	4	1	3	2	3
95	Cloudy, Triangle, extended root	1	1	2	1	1	3	2	1	1	2	1	0	0	0	2	1	1	1	1	3	4	2	2	2	4
96	Cloudy, Triangle, full root	1	1	2	1	1	3	2	1	1	2	1	0	0	0	2	1	1	1	1	4	4	2	2	2	1
97	Cone Elongated (no acrodin tip)	1	1	1	1	1	1	1	0	0	0	0	0	0	0	2	1	1	1	1	2	1	3	3	2	3
98	Cone Elongated (with acrodin tip)	1	1	1	1	1	1	1	0	0	0	0	0	0	0	2	3	1	1	1	2	1	3	3	2	3
99	Cone long thin root	1	1	1	1	1	1	1	0	0	0	0	0	0	0	2	1	1	1	1	2	3	5	2	2	3
100	Cone long thin root (acrodin tip)	1	1	1	1	1	1	1	0	0	0	0	0	0	0	2	3	1	1	1	2	3	1	2	2	1
101	Cone pointed tip	1	1	1	1	1	1	1	0	0	0	0	0	0	0	1	1	1	1	1	3	1	3	3	2	3
102	cone short dome root	1	1	1	1	1	1	1	0	0	0	0	0	0	0	2	2	1	1	1	3	2	3	3	2	3
103	Cone small curved	1	1	1	2	4	1	1	0	0	0	0	0	0	0	2	2	1	1	1	3	2	1	2	2	2
104	Cone small curved acrodin tip	1	1	1	3	4	1	1	0	0	0	0	0	0	0	2	3	1	1	1	3	2	1	2	2	2
105	Cone triangle root acrodin tip	1	1	1	1	1	1	1	0	0	0	0	0	0	0	2	3	1	1	1	3	2	2	2	1	4
106	Curved (minor), large concave root	1	1	2	2	1	3	2	1	4	4	1	0	0	0	2	1	1	1	1	4	3	4	3	3	5
107	Curved triangle dome root	1	1	2	3	4	3	2	1	3	2	1	0	0	0	2	1	1	1	1	4	2	3	3	3	3
108	Curved, Flange (fat)	1	1	2	3	5	3	2	2	1	4	1	1	2	2	2	1	4	1	1	3	4	2	2	2	5
109	Curved, Flange (large)	1	1	2	3	4	3	2	2	5	4	1	1	3	2	1	1	4	1	1	4	3	1	2	2	4
110	Curved, Flange (large) small root	1	1	2	3	4	3	2	2	5	4	1	1	3	2	1	1	1	1	1	3	2	1	2	2	4
111	Curved, Flange (small)	1	1	2	3	4	3	2	2	5	4	1	1	1	2	1	1	4	4	1	4	3	1	1	2	5
112	Curved, flat, 1/2-3/4 root, convex sides	1	1	2	2	3	3	2	1	1	2	1	0	0	0	2	1	1	2	1	2	3	5	3	2	3
113	Curved, large concave root	1	1	2	3	4	3	2	1	4	2	3	0	0	0	2	1	1	1	1	4	3	3	3	3	5
114	Curved, large concave root, asym bottom	1	1	2	3	4	3	2	1	4	4	1	0	0	0	2	1	4	4	1	4	3	4	1	3	5
115	Flared base, big curve	1	1	2	3	4	3	2	1	1	1	1	0	0	0	2	1	5	1	1	4	3	3	3	2	3
116	Flared base, cloudy bladed	1	1	2	1	2	3	2	1	1	1	1	0	0	0	3	1	5	1	1	4	3	3	3	2	3
117	Flared base, cusps	1	1	4	1	3	3	2	1	3	2	1	0	0	0	3	1	5	1	1	4	3	3	3	2	3
118	Flared base, flange	1	1	2	3	1	3	2	1	1	2	1	1	1	2	2	1	1	1	1	4	4	1	2	2	1
119	Flared base, short cloudy cone	1	1	1	1	3	1	1	0	0	0	0	0	0	0	3	1	5	1	1	4	2	3	2	2	3
120	Flared base, straight bladed cone	1	1	1	1	3	3	2	1	1	1	1	0	0	0	1	1	5	1	1	4	3	3	3	2	2
121	Flared blades, dome root	1	1	2	1	2	3	2	1	3	2	5	0	0	0	1	1	1	1	1	4	4	3	3	2	3
122	Hooked, flat head	1	1	1	2	3	3	2	1	1	1	2	0	0	0	3	1	1	1	1	4	4	3	3	2	3
123	Large long cone	1	1	1	2	1	1	1	0	0	0	0	0	0	0	1	1	1	1	1	4	1	1	3	2	3
124	Large long curved bladed cone	1	1	1	3	4	2	2	1	1	1	1	0	0	0	1	1	5	1	1	4	3	3	3	2	3
125	Large long straight bladed cone	1	1	1	1	1	3	2	1	1	1	1	0	0	0	1	1	5	1	1	4	3	3	3	2	3
126	Large long curved cone	1	1	1	3	4	1	1	0	0	0	0	0	0	0	1	1	5	1	1	4	1	3	3	2	3
127	Mostly Blade	1	1	2	1	5	3	3	3	1	2	1	0	0	0	2	1	1	1	1	2	3	6	2	2	2
128	Pointy, Flare bottom, curve	1	1	2	2	3	3	2	1	1	2	1	0	0	0	1	1	5	1	1	4	3	3	3	2	3
129	Pointy, flare bottom, tall	1	1	2	1	1	3	2	1	3	2	1	0	0	0	1	1	5	1	1	4	3	1	3	2	3
130	Pointy, flare bottom, wide	1	1	2	1	6	3	2	1	3	2	1	0	0	0	1	1	5	1	1	4	3	1	3	2	3
131	Pointy, flare, convex	1	1	2	1	3	3	2	1	1	2	1	0	0	0	1	1	5	1	1	4	3	3	3	2	3
132	Right Triangle, flat	1	1	2	1	6	3	2	1	1	2	1	0	0	0	2	1	1	1	1	3	2	1	1	2	2
133	Right Triangle, one blade	1	1	2	1	6	3	3	3	1	2	1	0	0	0	2	1	1	1	1	4	2	1	2	2	3
134	Short triange flared blades	1	1	2	1	1	3	2	1	3	2	1	0	0	0	2	1	2	1	1	4	2	1	2	2	2
135	Straight, half-length flange	1	1	2	1	1	3	3	3	1	2	1	1	3	3	2	1	1	1	1	3	3	2	2	1	5
136	Straight, many cusps	1	1	4	1	0	3	1	0	0	0	0	0	0	0	0	0	0	0	0	0	0	0	0	0	0
